# Supplementary material for: Paramagnetic ruthenium-biimidazole derivatives [(acac)2RuIII(LHn)]m, n/m = 2/+, 1/0, 0/−. Synthesis, structures, solution properties and anion receptor features in solution state
Source: Royal Society of Chemistry journal article supplement (doi:10.1039/b919036h), 2010-01-01
Supplement: b919036h.pdf [file b919036h.pdf]

## **Supplementary Material**

**Table S1** Hydrogen bonds (Å and deg) in **1**

| D-H...A       | d(D-H)  | d(H...A) | d(D...A) | ∠D-H...A |
|---------------|---------|----------|----------|----------|
| N2-H2N...N4#1 | 0.81(5) | 2.022(5) | 2.836(5) | 177.47   |
| N6-H6N...N8#3 | 0.76(7) | 2.127(3) | 2.870(4) | 165.59   |

#1: -x,+y,-z+1/2

#3: x+1/2,+y-1/2,+z

**Table S2** Hydrogen bonds (Å and deg) in **2**

| D-H...A            | d(D-H)   | d(H...A)  | d(D...A)  | ∠D-H...A  |
|--------------------|----------|-----------|-----------|-----------|
| N2-H2N...O111(#1)  | 0.818(5) | 2.498(9)  | 3.062(10) | 127.19(8) |
| N2-H2N...O333(#2)  | 0.818(4) | 2.351(5)  | 2.988(16) | 135.21(8) |
| N4-H4N ...O111(#1) | 0.880(9) | 2.340(8)  | 3.049(12) | 137.75(6) |
| N4-H4N ...O111(#3) | 0.880(9) | 2.330(10) | 3.016(14) | 134.77(6) |

#1: x,y,z

#2: -x+1/2+1,+y+1/2,-z-1/2

#3: -x+1/2+1,+y-1/2,-z-1/2

**Table S3** List of Fourier peaks showing coordinates and distances in the asymmetric unit of **1**.

|     | x | y       | z       | sof    | U       | Peak | Distances to nearest atoms<br>(including symmetry equivalents) |           |          |           |           |
|-----|---|---------|---------|--------|---------|------|----------------------------------------------------------------|-----------|----------|-----------|-----------|
| Q1  | 1 | 0.4737  | 0.1513  | 0.7023 | 1.00000 | 0.05 | 0.79                                                           | 1.01 N5   | 1.06 RU2 | 2.08 C24  | 2.17 C22  |
| Q2  | 1 | 0.2582  | 0.0790  | 0.2945 | 1.00000 | 0.05 | 0.75                                                           | 1.03 RU1  | 1.13 O4  | 1.89 O2   | 1.96 C9   |
| Q3  | 1 | 0.0244  | 0.2004  | 0.7953 | 1.00000 | 0.05 | 0.68                                                           | 0.98 RU3  | 1.42 O7  | 1.54 O8   | 2.06 O7   |
| Q4  | 1 | 0.4727  | 0.2164  | 0.7034 | 1.00000 | 0.05 | 0.65                                                           | 0.94 O6   | 1.08 RU2 | 1.95 C20  | 2.23 O5   |
| Q5  | 1 | 0.0291  | 0.2595  | 0.7992 | 1.00000 | 0.05 | 0.62                                                           | 1.07 RU3  | 1.44 N7  | 1.48 O8   | 2.08 N7   |
| Q6  | 1 | 0.2056  | 0.0772  | 0.2076 | 1.00000 | 0.05 | 0.60                                                           | 1.02 RU1  | 1.26 N3  | 1.86 O3   | 2.05 O4   |
| Q7  | 1 | 0.2527  | 0.0149  | 0.3017 | 1.00000 | 0.05 | 0.59                                                           | 1.02 RU1  | 1.22 O2  | 2.01 N1   | 2.02 O1   |
| Q8  | 1 | 0.2622  | 0.0578  | 0.2242 | 1.00000 | 0.05 | 0.51                                                           | 1.00 RU1  | 1.07 O3  | 1.99 C7   | 2.05 O2   |
| Q9  | 1 | 0.2026  | 0.0148  | 0.2141 | 1.00000 | 0.05 | 0.51                                                           | 1.01 RU1  | 1.14 O1  | 1.90 N3   | 2.16 N1   |
| Q10 | 1 | 0.0689  | 0.2378  | 0.7793 | 1.00000 | 0.05 | 0.46                                                           | 0.76 O8   | 1.46 RU3 | 1.77 C28  | 2.24 N7   |
| Q11 | 1 | 0.5000  | 0.0510  | 0.7500 | 0.50000 | 0.05 | 0.42                                                           | 0.74 C24  | 1.81 N6  | 1.89 N5   | 2.82 H5B  |
| Q12 | 1 | 0.4618  | 0.1856  | 0.7865 | 1.00000 | 0.05 | 0.41                                                           | 0.87 O5   | 1.13 RU2 | 1.86 C18  | 2.27 O6   |
| Q13 | 1 | 0.1910  | 0.0465  | 0.3022 | 1.00000 | 0.05 | 0.41                                                           | 0.89 N1   | 1.25 RU1 | 1.74 C13  | 2.01 N3   |
| Q14 | 1 | 0.2792  | 0.2083  | 0.4120 | 1.00000 | 0.05 | 0.39                                                           | 0.77 H10C | 0.83 C10 | 0.98 H10A | 1.72 H10B |
| Q15 | 1 | 0.3218  | -0.0492 | 0.2780 | 1.00000 | 0.05 | 0.38                                                           | 0.69 C3   | 0.74 C4  | 1.47 H3   | 1.72 O2   |
| Q16 | 1 | 0.0302  | 0.2243  | 0.7204 | 1.00000 | 0.05 | 0.37                                                           | 0.91 RU3  | 1.56 O7  | 1.76 O8   | 1.85 N7   |
| Q17 | 1 | 0.3368  | 0.0025  | 0.3927 | 1.00000 | 0.05 | 0.37                                                           | 0.85 O2   | 1.36 C4  | 1.83 C5   | 1.91 H5C  |
| Q18 | 1 | 0.3218  | 0.1583  | 0.0619 | 1.00000 | 0.05 | 0.37                                                           | 0.83 H6C  | 0.94 C6  | 0.99 H6B  | 1.82 H6A  |
| Q19 | 1 | -0.0111 | 0.3729  | 0.6001 | 1.00000 | 0.05 | 0.35                                                           | 0.77 C31  | 0.90 N8  | 1.54 C30  | 1.57 C32  |

Q20 1 0.1835 -0.1124 0.0764 1.00000 0.05 0.35 0.86 H1A 1.04 H1C 1.04 C1  
1.90 H1B

**Q21 1 -0.0188 0.4299 0.6471 1.00000 0.05 0.35 0.84 N8 1.90 C32  
2.00 C31 2.03 N6**

Q22 1 0.3736 -0.0387 0.3373 1.00000 0.05 0.35 0.73 C4 0.85 C5 1.38 H5B  
1.42 H5A

Q23 1 0.1601 0.0499 0.2295 1.00000 0.05 0.34 1.03 N3 1.45 C14 1.46 RU1  
1.64 N1

Q24 1 0.0553 0.2772 0.7332 1.00000 0.05 0.34 1.24 N7 1.69 RU3 1.76 O8  
2.02 C32

Q25 1 0.1157 0.2138 0.8134 1.00000 0.05 0.34 0.70 O8 0.74 C28 1.88 C29  
1.89 C27

Q26 1 0.2114 0.1861 0.8769 1.00000 0.05 0.34 0.64 C29 0.77 H29A 0.90  
H29B 1.55 H29C

Q27 1 0.4746 0.1207 0.6594 1.00000 0.05 0.34 0.59 N5 1.56 C24 1.59 C22  
1.92 RU2

Q28 1 0.3004 0.0376 0.2996 1.00000 0.05 0.34 0.84 O2 1.51 RU1 1.79 C4  
2.08 O3

Q29 1 0.0842 0.0491 0.2437 1.00000 0.05 0.33 0.82 C14 0.88 C13 1.70 N4  
1.81 N2

Q30 1 0.2050 0.0718 0.2827 1.00000 0.05 0.32 0.96 RU1 1.53 O4 1.61 N1  
1.75 N3

Q31 1 0.3309 0.1156 0.1363 1.00000 0.05 0.32 0.72 C6 0.81 C7 1.29 H6A  
1.43 H6C

Q32 1 0.3353 0.0937 0.0486 1.00000 0.05 0.31 0.89 H6C 0.96 H6A 1.02 C6  
1.83 H6B

**Q33 1 0.4670 -0.0264 0.6543 1.00000 0.05 0.31 1.00 N6 1.86 N8  
2.04 C24 2.16 C23**

Q34 1 0.4785 0.1617 0.7828 1.00000 0.05 0.31 0.91 RU2 1.32 O5 1.81 N5  
1.93 N5

Q35 1 0.0899 0.1398 0.7339 1.00000 0.05 0.31 0.65 C27 0.80 C26 1.47 H27  
1.72 C28

Q36 1 -0.0090 0.3364 0.5501 1.00000 0.05 0.31 0.83 C30 0.90 C31 1.40 H30  
1.48 H31

Q37 1 0.4488 0.2733 0.6777 1.00000 0.05 0.30 0.68 O6 0.96 C20 2.00 C21  
2.10 C19

Q38 1 0.2809 0.1055 0.1401 1.00000 0.05 0.30 0.75 C7 0.88 O3 1.70 C6 1.88  
H6C

Q39 1 0.2550 -0.0397 0.3808 1.00000 0.05 0.30 1.89 O2 1.90 H11 2.25 C11  
2.28 C4

Q40 1 0.4656 0.2618 0.6191 1.00000 0.05 0.30 0.88 O6 1.79 C20 2.20 H21A  
2.31 C21

Q41 1 0.2310 -0.0380 0.1618 1.00000 0.05 0.29 0.67 O1 0.88 C2 1.94 C1 2.03  
C3

Q42 1 0.0184 0.0804 0.5930 1.00000 0.05 0.28 0.66 H25A 0.90 C25 1.18  
H25C 1.80 H25B

Q43 1 0.1285 0.0874 0.1251 1.00000 0.05 0.28 0.65 C16 0.77 N3 1.44 H16  
1.65 C15  
Q44 1 0.2721 0.1395 0.3184 1.00000 0.05 0.28 0.64 O4 0.66 C9 1.81 C8 1.91  
C10  
Q45 1 0.1612 0.1823 0.8672 1.00000 0.05 0.28 0.72 C29 0.79 C28 1.35 H29B  
1.39 H29C  
Q46 1 0.3666 0.2272 0.8416 1.00000 0.05 0.28 0.75 C17 0.84 C18 1.25 H17B  
1.39 H17A  
Q47 1 0.0291 0.1608 0.6436 1.00000 0.05 0.28 0.54 O7 1.13 C26 2.06 C25  
2.22 H25C  
Q48 1 0.4600 0.0873 0.7133 1.00000 0.05 0.27 0.75 C24 0.81 N5 1.71 C24  
1.88 N6  
Q49 1 0.2394 0.1360 0.3727 1.00000 0.05 0.27 0.86 O4 1.73 C9 1.94 H21B  
2.11 H10C  
Q50 1 0.2616 0.1482 0.2978 1.00000 0.05 0.27 0.70 C9 0.79 O4 1.73 C8 1.96  
C10

- Fig. S1** EPR spectrum of  $[(\text{acac})_2\text{Ru}^{\text{III}}(\text{HL}^-)]$  (**1**) in 1:1  $\text{CH}_2\text{Cl}_2$ -tolene at 77 K.
- Fig. S2**  $^1\text{H}$  NMR spectra in  $\text{CDCl}_3$  of (a)  $[(\text{acac})_2\text{Ru}^{\text{III}}(\text{HL}^-)]$  (**1**) and (b)  $[(\text{acac})_2\text{Ru}^{\text{III}}(\text{HL}_2)](\text{ClO}_4)$  (**2**).
- Fig. S3** Showing Q-peaks over N6 as Q33 (Green, Molecule **2**<sup>+</sup>) and N8 as Q21 (Green, Molecule **3**<sup>-</sup>) in the crystal of **1**.
- Fig. S4** Single crystal X-ray structure of the cation of  $[(\text{acac})_2\text{Ru}^{\text{III}}(\text{H}_2\text{L})](\text{ClO}_4)$  (**2**).
- Fig. S5** UV-vis. spectra of **2** ( $5 \times 10^{-5}$  mole  $\text{dm}^{-3}$ ) in  $\text{CH}_3\text{CN}$  and on addition of one equivalent TBA salts of  $\text{Cl}^-$ ,  $\text{Br}^-$ ,  $\text{I}^-$ ,  $\text{HSO}_4^-$ ,  $\text{OAc}^-$  and  $\text{H}_2\text{PO}_4^-$  and six equivalents of  $\text{F}^-$  (TBA = Tetrabutylammonium).
- Fig. S6** UV-vis. spectral changes of **2** ( $5 \times 10^{-5}$  mole  $\text{dm}^{-3}$ ) in  $\text{CH}_3\text{CN}$  on gradual additions of 0-5 equivalents TBA salts of (a)  $\text{Cl}^-$ , (b)  $\text{Br}^-$ , (c)  $\text{I}^-$  and (d)  $\text{HSO}_4^-$  (TBA = Tetrabutylammonium).
- Fig. S67** (a) The plot of the change in absorbance ( $\Delta A$ ) with respect to the initial absorbance of **2** at 516 nm in  $\text{CH}_3\text{CN}$  on each addition of  $\text{OAc}^-$  versus the concentration of  $\text{OAc}^-$ .  
  
(b) The plot of the change in absorbance ( $\Delta A$ ) with respect to the initial absorbance of **2** at 516 nm in  $\text{CH}_3\text{CN}$  on each addition of  $\text{F}^-$  versus the concentration of  $\text{OAc}^-$ .
- Fig S8** UV-vis. spectral changes of **2** ( $5 \times 10^{-5}$  mole  $\text{dm}^{-3}$ ) in  $\text{CH}_3\text{CN}$  on gradual additions of 0-7 equivalents of  $[\text{TBA}][\text{OAc}]$ .

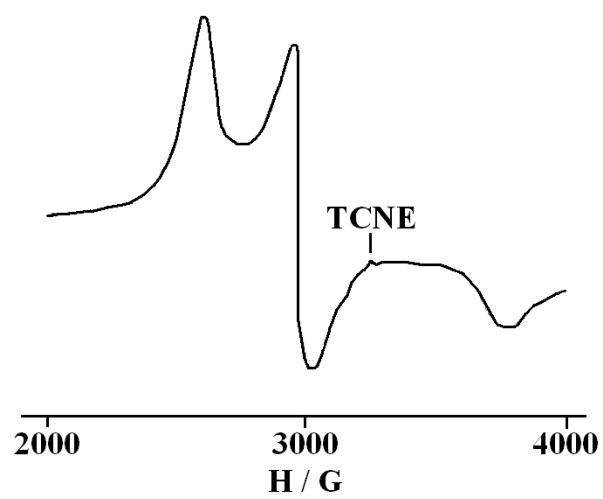

**Fig. S1**

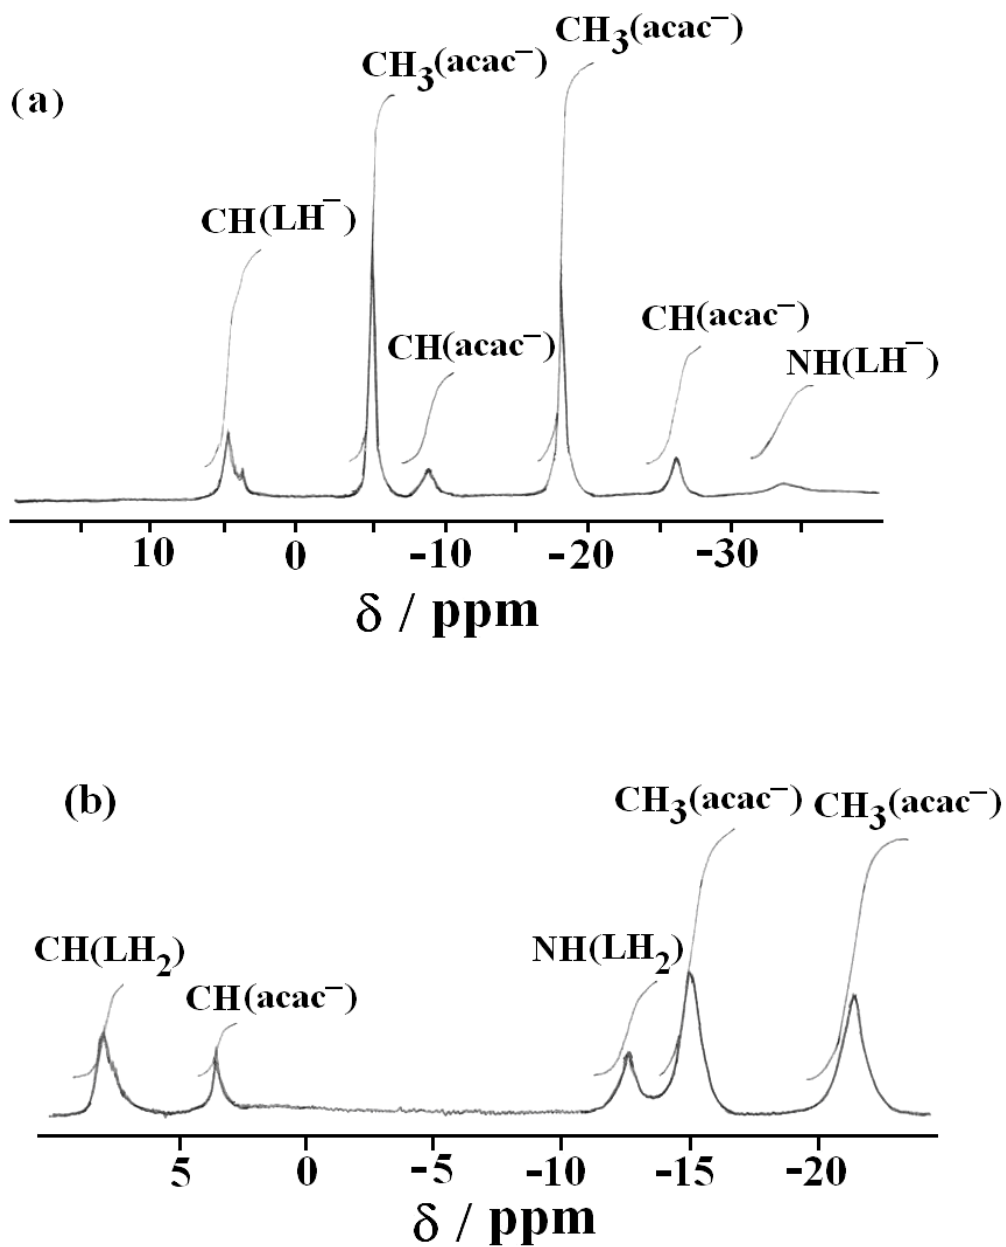

Fig. S2



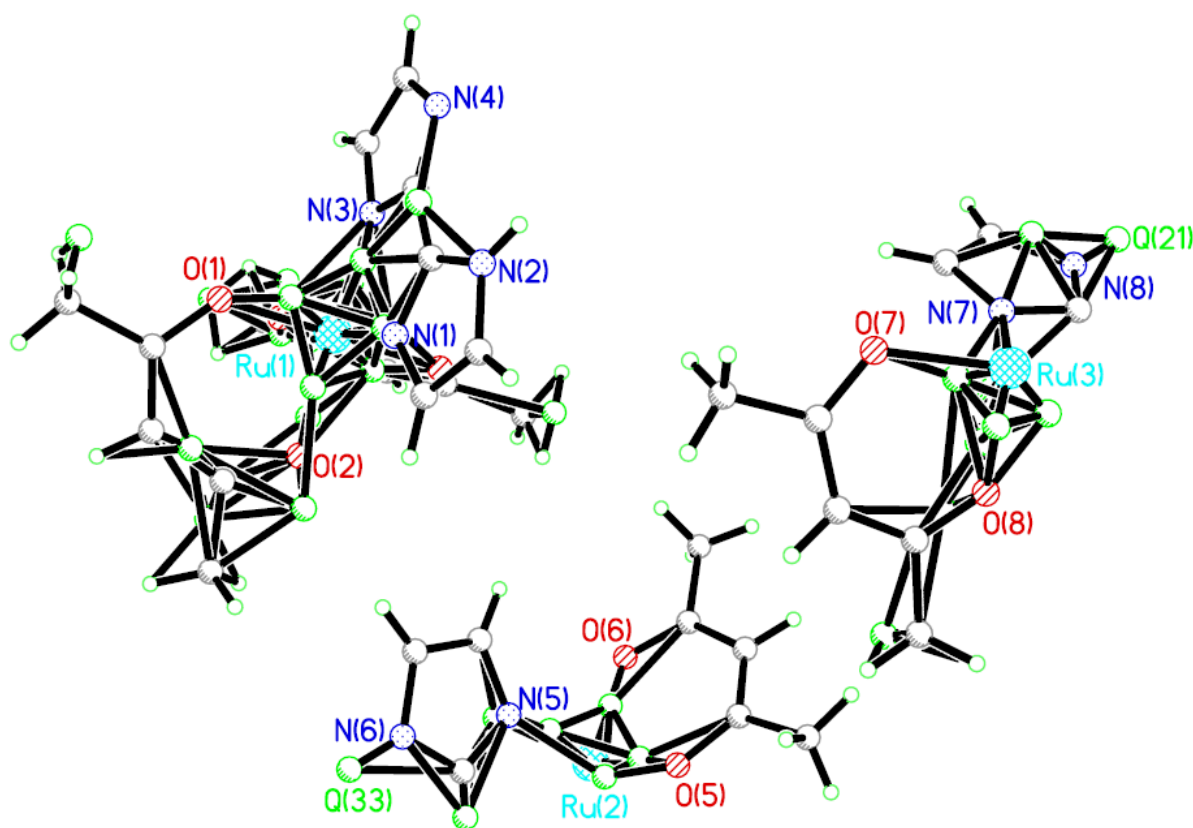

**Fig. S3**

The proton over nitrogen atom, N6 in  $2^+$  could be generated via Fourier map (Fig S3 and Table S3) with low intense peak of Q33=  $0.31 \text{ e}/\text{\AA}^3$  at a distance of N6-Q33 =  $1.002 \text{ \AA}$ . This proton retains the realistic geometry on refinement.

We have also seen one low-intense peak at N8 of molecule  $3^-$  with Q21 =  $0.35 \text{ e}/\text{\AA}^3$  but at a shorter distance of N8-Q21 =  $0.84 \text{ \AA}$ . However, it fails to retain the realistic geometry after refinement, therefore the said peak was neglected.

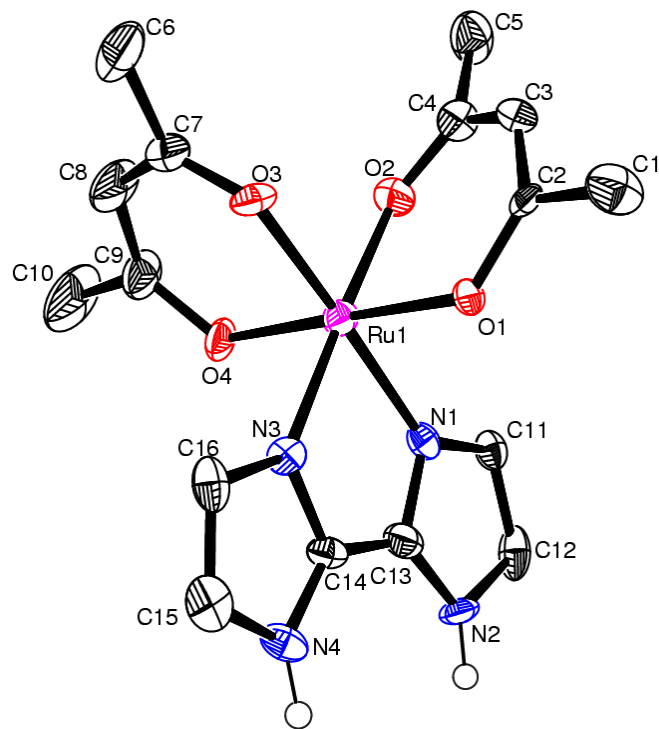

**Fig. S4**

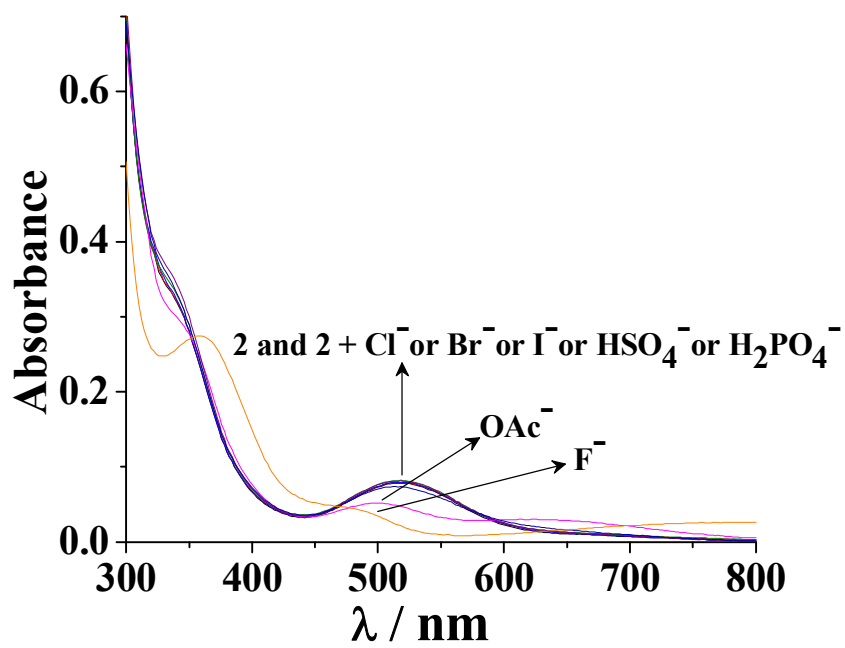

Fig. S5

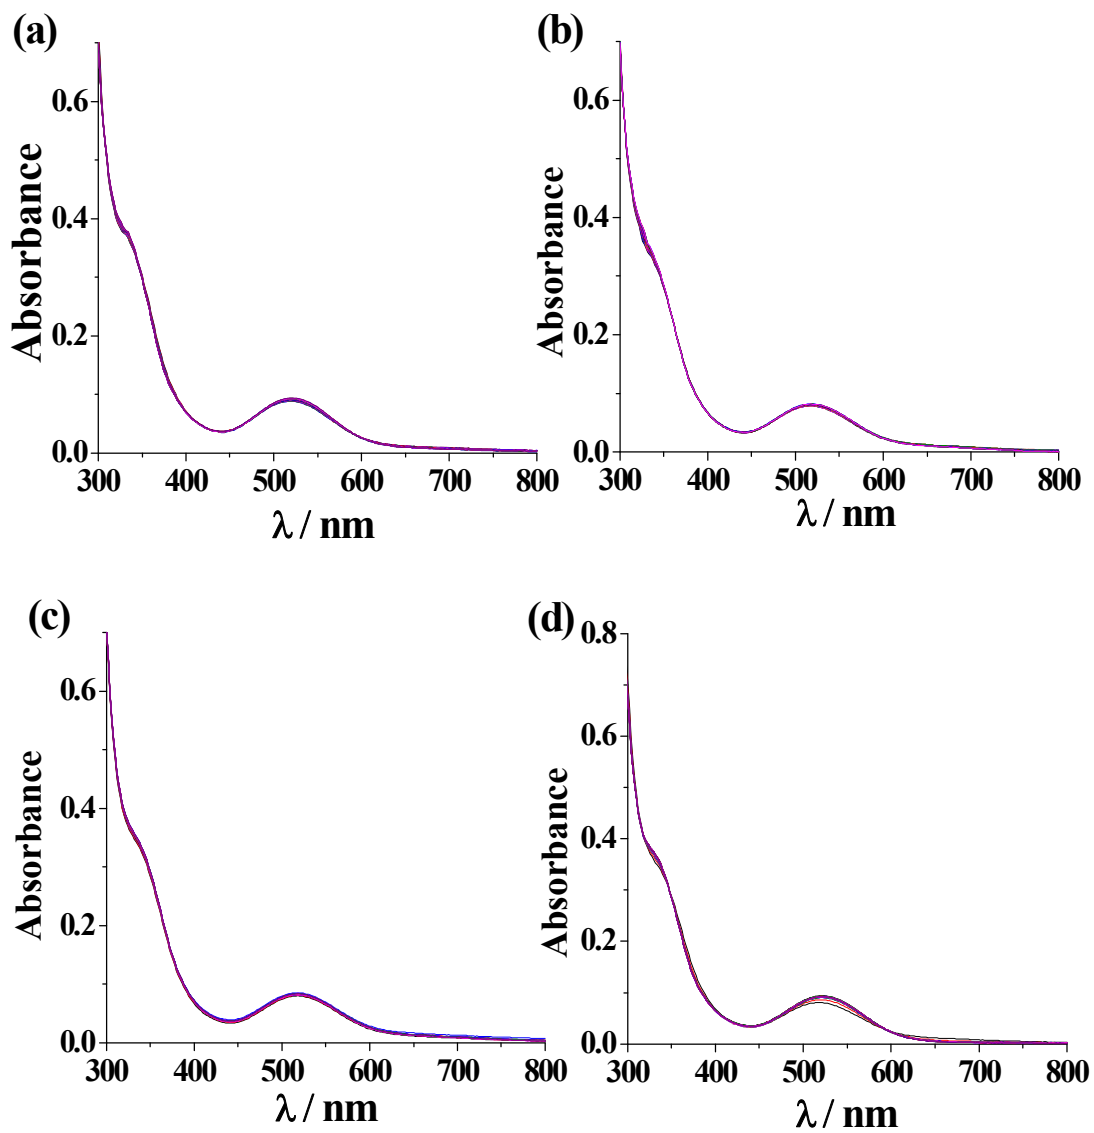

Fig. S6

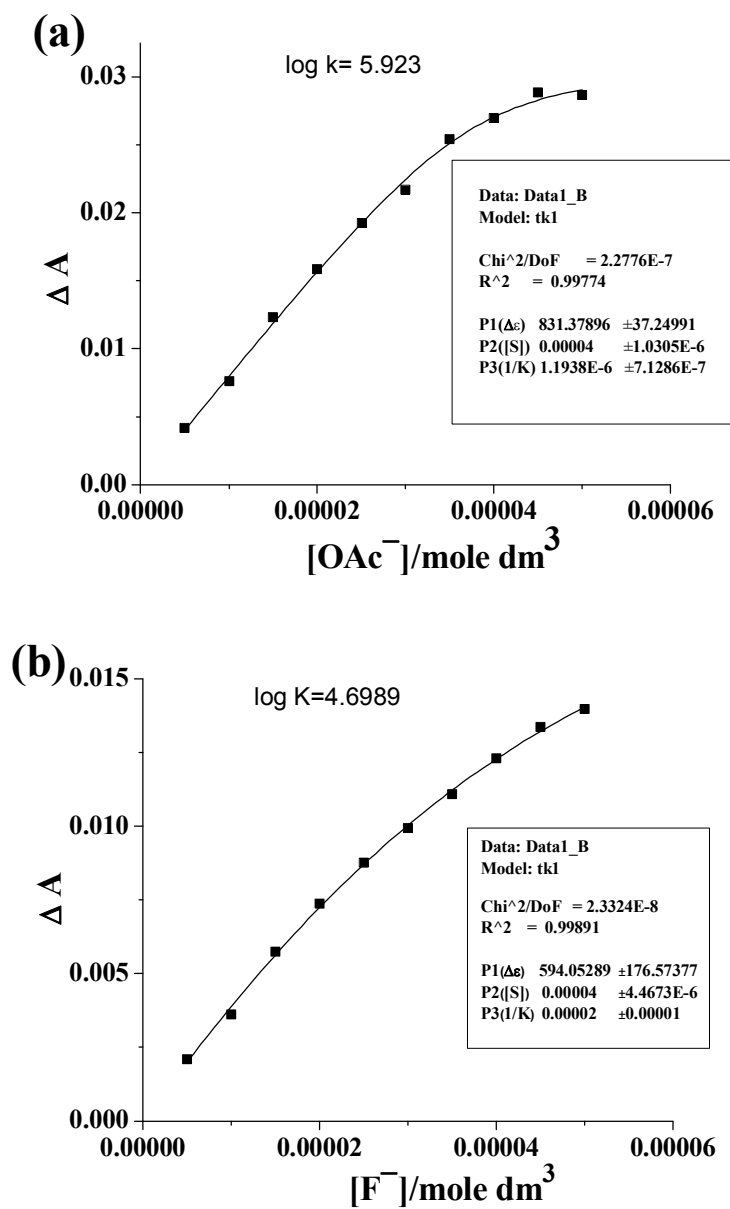

Fig. S7

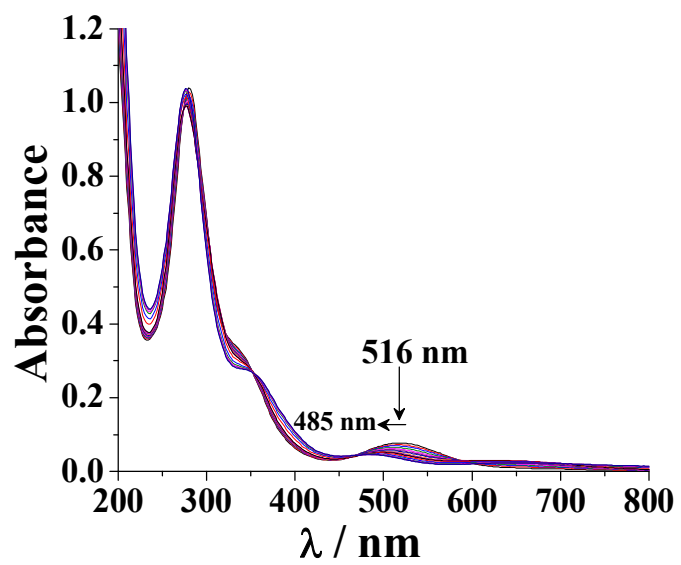

Fig. S8
